# Supplementary material for: LINC00649 promotes bladder cancer malignant progression by regulating the miR-15a-5p/HMGA1 axis
Source: PubMed Central journal article supplement — Oncol Rep. 2021 Feb 1;45(4):8. doi: 10.3892/or.2021.7959 (PMC7876990; doi:10.3892/or.2021.7959), 2021-02-01

Figure S1. The efficiency of miR-15a-5p mimics and oe-HMGA1. (A) The miR-15a-5p mimics significantly increased the expression level of miR-15a-5p in T24 and UM-UC-3. (B and C) The oe-HMGA1 significantly increased the mRNA and protein expression level of HMGA1 in T24 and UM-UC-3. \*\*P<0.01.

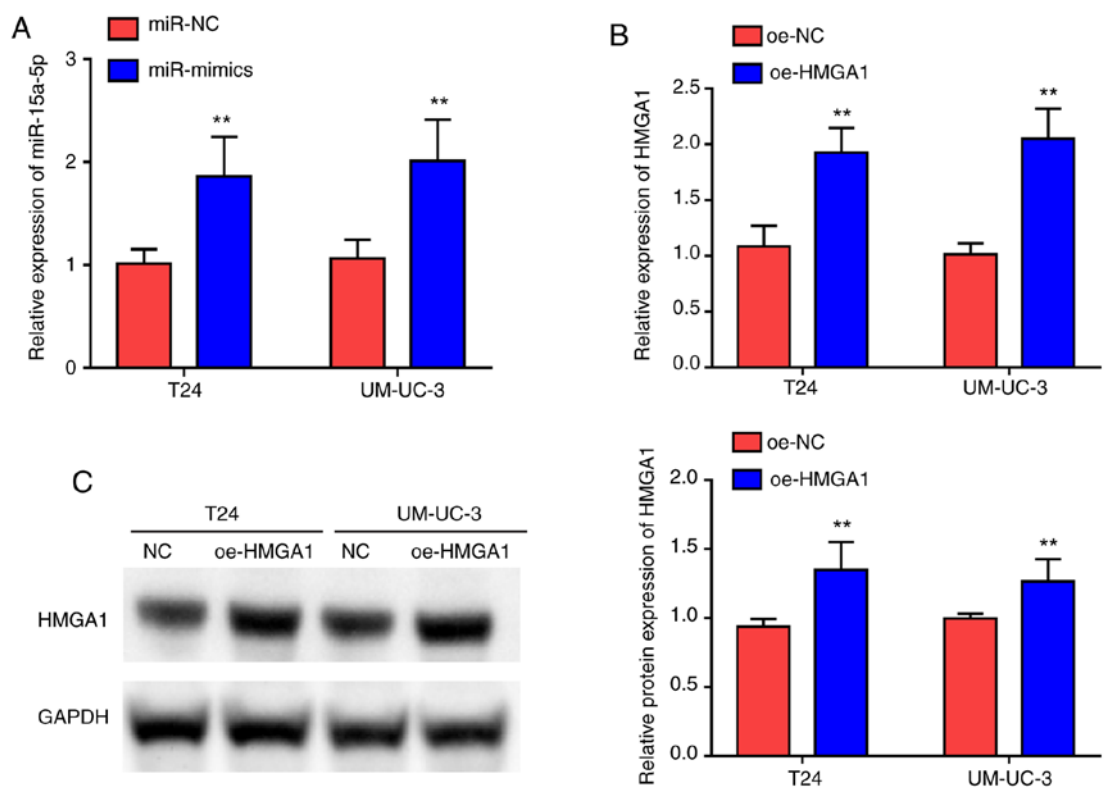

Supplement: Supplementary_Data.pdf [file Supplementary_Data.pdf]
